# Supplementary material
Source: PubMed Central journal article supplement (PMC3985762)
Supplement: bi401280v_si_001.pdf [file bi401280v_si_001.pdf]

SUPPORTING INFORMATION

## The Reaction Dynamics of ATP Hydrolysis Catalyzed by P-glycoprotein

Funding sources: This work was supported by NIH GM098457 (WMA), and also by the Department of Medicinal Chemistry.

Michele Scian,<sup>#</sup> Mauro Acchione,<sup>#</sup> Mavis Li, William M. Atkins\*

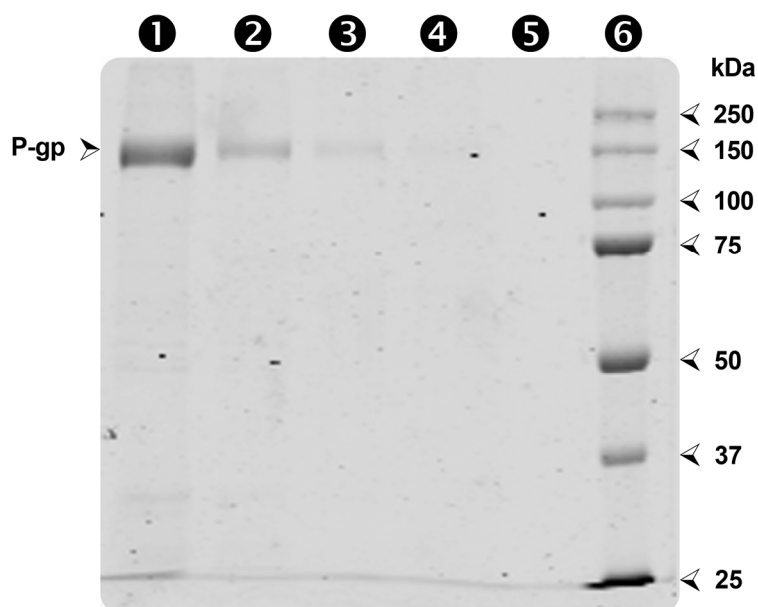

**Figure S1.** SDS-PAGE of a representative P-gp purification. Lanes are as follow: 1 – first elution; 2 - second elution; 3 – third elution; 4 & 5 - blank; 6 - molecular weight standards. See Methods in the manuscript for details.
